# Supplementary material
Source: PubMed Central journal article supplement (PMC6583841)
Supplement: jamasurg-154-637-s001.pdf [file jamasurg-154-637-s001.pdf]

## Supplementary Online Content

Chung KC, Yoon AP, Malay S, Shauver MJ, Wang L, Kaur S; FRANCHISE Group. Patient-reported and functional outcomes after revision amputation and replantation of digit amputations: the FRANCHISE multicenter international retrospective cohort study. *JAMA Surg*. Published online April 17, 2019. doi:10.1001/jamasurg.2019.0418

### **eTable.** Factors Associated With Type of Treatment

This supplementary material has been provided by the authors to give readers additional information about their work.

**eTable.** Factors Associated With Type of Treatment

| Characteristics                                          | OR (95% CI)             | P values |
|----------------------------------------------------------|-------------------------|----------|
| <b>Site</b>                                              |                         |          |
| Non-US                                                   | 1                       | -        |
| US                                                       | 0.10 ( 0.01 , 0.22 )    | <0.001   |
| <b>Gender</b>                                            |                         |          |
| Men                                                      | 1                       | -        |
| Women                                                    | 1.34 ( 0.59 , 3.08 )    | 0.483    |
| <b>Race</b>                                              |                         |          |
| White                                                    | 1                       | -        |
| Non-white                                                | 1.42 ( 0.33 , 6.07 )    | 0.636    |
| <b>Whether or not had insurance</b>                      |                         |          |
| No                                                       | 1                       | -        |
| Yes                                                      | 1.88 ( 0.86 , 4.13 )    | 0.113    |
| <b>Annual Household Income</b>                           |                         |          |
| Less than \$60,000                                       | 1                       | -        |
| \$60,000 or more                                         | 1.71 ( 0.74 , 3.93 )    | 0.21     |
| <b>Work-related injury</b>                               |                         |          |
| No                                                       | 1                       | -        |
| Yes                                                      | 1.36 ( 0.66 , 2.79 )    | 0.405    |
| <b>Injury group</b>                                      |                         |          |
| Single finger, not thumb-Distal to PIP joint             | 1                       | -        |
| Single finger, not thumb-Proximal to PIP joint           | 2.23 ( 0.76 , 6.57 )    | 0.145    |
| Thumb only- Distal to IP joint                           | 3.92 ( 1.32 , 11.71 )   | 0.014    |
| Thumb only- Proximal to IP joint                         | 5.77 ( 1.84 , 18.1 )    | 0.003    |
| Multi-finger, not thumb-2 digits amputated               | 1.83 ( 0.78 , 4.29 )    | 0.164    |
| Multi-finger, not thumb-3 or more digits amputated       | 7.72 ( 2.86 , 20.88 )   | <0.001   |
| Multi-finger, including thumb-2 digits amputated         | 18.87 ( 2.72 , 131.09 ) | 0.003    |
| Multi-finger, including thumb-3 or more digits amputated | 4.77 ( 0.98 , 23.14 )   | 0.052    |
